# Supplementary material
Source: PubMed Central journal article supplement (PMC2174895)
Supplement: plntcell_tpc.107.052829_1.pdf [file plntcell_tpc.107.052829_1.pdf]

**Supplemental Figure 1. Aligned Kyte and Doolittle Hydrophobicity Plots.**

Hydrophobins were identified with HMMER v2.0 and classified according to their hydropathy profiles. A multiple alignment generated with CLUSTALW was manually curated to ensure alignment of the 8 cysteine residues typically conserved among fungal hydrophobins (indicated by vertical lines). Hydrophobicity profiles were calculated along the alignment with a 7bp window as per Kyte and Doolittle (1982).

**Reference:**

**Kyte, J. and Doolittle, R.** (1982). A simple method for displaying the hydropathic character of a protein. *J. Mol. Biol.* **157**: 105-132.

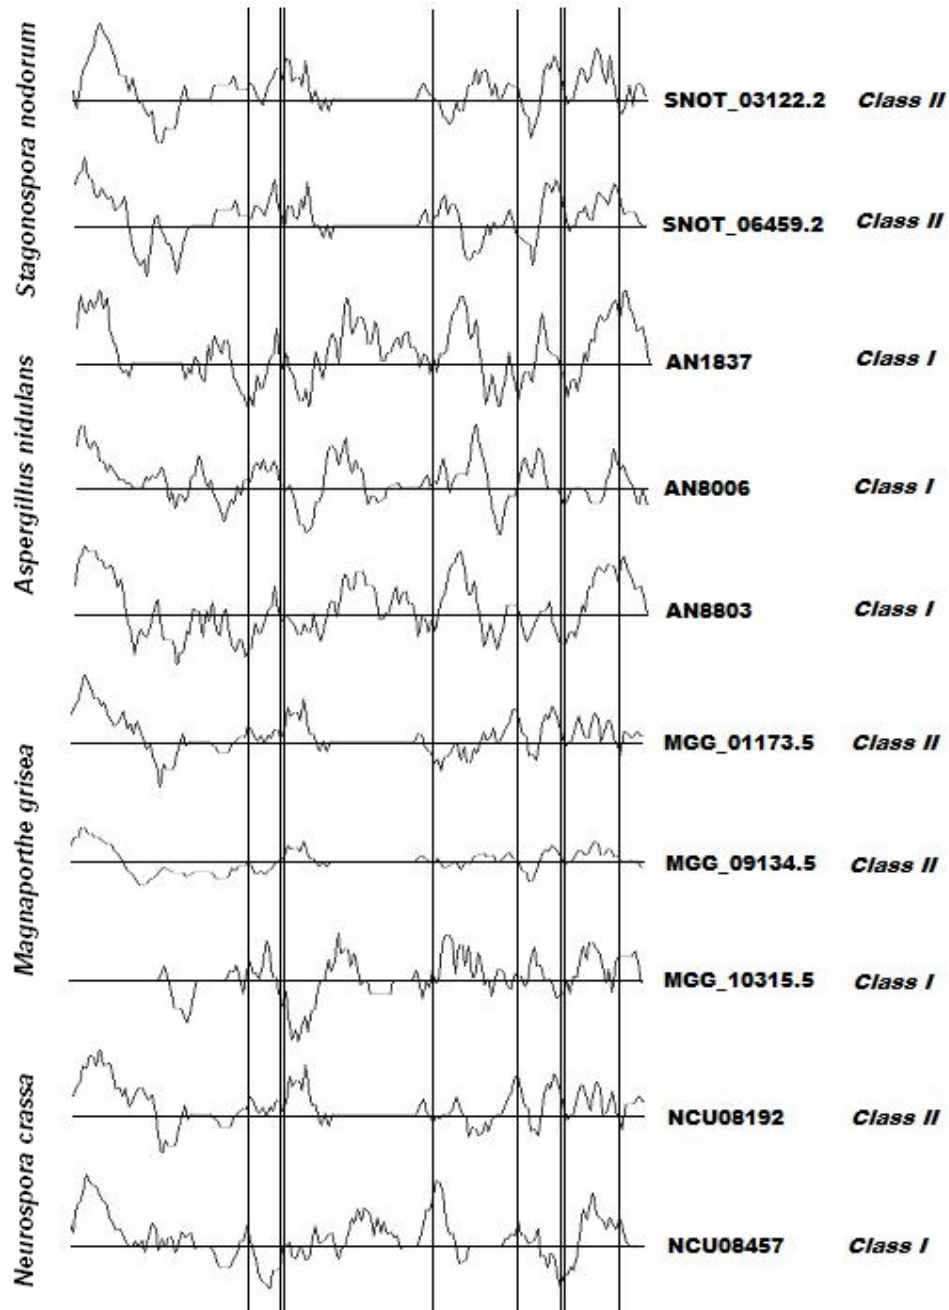

**Supplemental Figure 2. Quantitative PCR analysis of gene expression from *in planta* associated genes.**

Expression of genes abundant in the *in planta* library were determined in four different growth states: In vitro non-sporulating (4 dpi), In vitro sporulating (18 dpi), *In planta* non-sporulating (8 dpi), and *in planta* sporulating (12 dpi). Analysed genes are as follows: (A) SNOG\_00557.2, (B) SNOG\_03877.2 (C) SNOG\_08496.2, (D) SNOG\_11873.2, (E) SNOG\_12085.2, (F) SNOG\_12441.2 (G) SNOG\_14274.2, (H) SNOG\_16499.2. Transcript levels were calculated as ng/reaction relative to that of actin. Three biological replicate RNAs were pooled prior to cDNA synthesis. n=2, std error bars shown. PCR primers and EST data for these genes are given in Supplemental Tables 2 and 3, respectively.

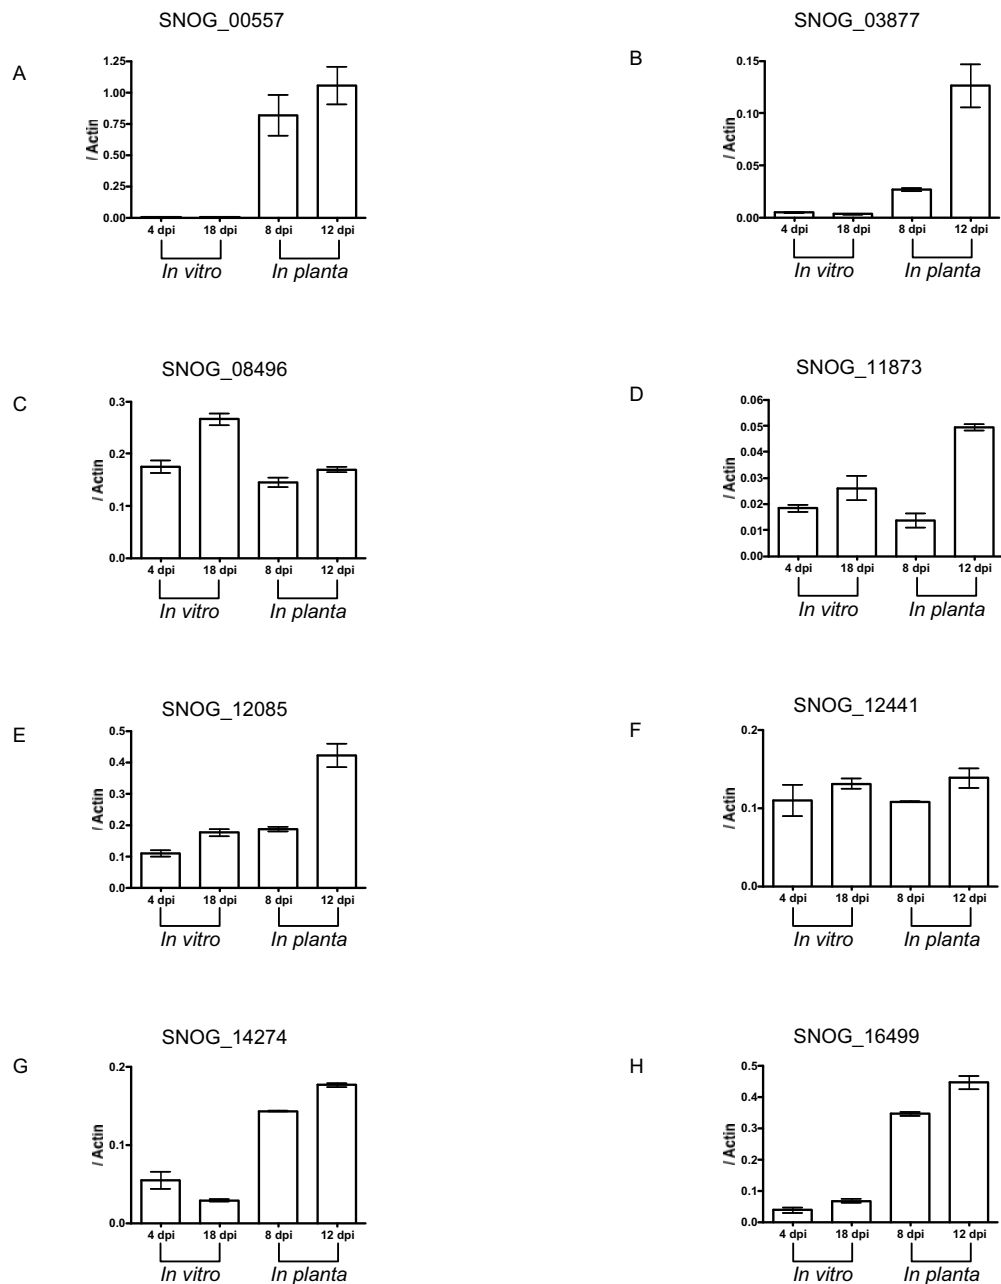

**Supplemental Table 1. Mitochondrial Genes.**

| Origin | program | group | Start         | Stop   |   | frame | name                            | tRNA |
|--------|---------|-------|---------------|--------|---|-------|---------------------------------|------|
| mtDNA  | P.nod   | tRNA  | 3207          | 3277   | . | +     | tRNA-Thr                        | T    |
| mtDNA  | P.nod   | tRNA  | 3302          | 3373   | . | +     | tRNA-Met1                       | M1   |
| mtDNA  | P.nod   | tRNA  | 3375          | 3447   | . | +     | tRNA-Met2                       | M2   |
| mtDNA  | P.nod   | tRNA  | 4127          | 4199   | . | +     | tRNA-Glu                        | E    |
| mtDNA  | P.nod   | tRNA  | 4230          | 4301   | . | +     | tRNA-Ala                        | A    |
| mtDNA  | P.nod   | tRNA  | 5232          | 5304   | . | +     | tRNA-Phe                        | F    |
| mtDNA  | P.nod   | tRNA  | 5651          | 5732   | . | +     | tRNA-Leu1                       | L    |
| mtDNA  | P.nod   | tRNA  | 5807          | 5878   | . | +     | tRNA-Gln                        | Q    |
| mtDNA  | P.nod   | tRNA  | 5884          | 5956   | . | +     | tRNA-His                        | H    |
| mtDNA  | P.nod   | tRNA  | 6088          | 6159   | . | +     | tRNA-Met3                       | M3   |
| mtDNA  | P.nod   | gene  | 7021          | 9267   | . | +     | cytb                            |      |
| mtDNA  | P.nod   | exon  | 7021          | 7526   | . | +     | cytb exon 1                     |      |
| mtDNA  | P.nod   | gene  | (intron)7558  | 8487   | . | +     | I-AniI (LAGLIDADG endonuclease) |      |
| mtDNA  | P.nod   | exon  | 8574          | 9267   | . | +     | cytb exon 2                     |      |
| mtDNA  | P.nod   | gene  | 10215         | 12723  | . | +     | atp6                            |      |
| mtDNA  | P.nod   | exon  | 10215         | 10778  | . | +     | atp6 exon 1                     |      |
| mtDNA  | P.nod   | gene  | (intron)11639 | 12409+ | . | .     | GIY...YIG endonuclease          |      |
| mtDNA  | P.nod   | gene  | 12523         | 12723  | . | +     | atp6 exon 2                     |      |
| mtDNA  | P.nod   | orf   | 12800         | 13723  | . | +     | orf1                            |      |
| mtDNA  | P.nod   | orf   | 15653         | 17797  | . | +     | orf2                            |      |
| mtDNA  | P.nod   | tRNA  | 19011         | 19081  | . | +     | tRNA-Val1                       | V    |
| mtDNA  | P.nod   | tRNA  | 19112         | 19181  | . | +     | tRNA-Cys                        | C    |
| mtDNA  | P.nod   | gene  | 19829         | 21414  | . | +     | cox1                            |      |
| mtDNA  | P.nod   | gene  | 21443         | 22198  | . | +     | cox2                            |      |
| mtDNA  | P.nod   | gene  | 22535         | 23787  | . | +     | S5 rib protein                  |      |
| mtDNA  | P.nod   | gene  | 25603         | 27070  | . | +     | nad4                            |      |
| mtDNA  | P.nod   | exon  | 25603         | 25785  | . | +     | nad4 exon1                      |      |
| mtDNA  | P.nod   | exon  | 25930         | 27070  | . | +     | nad4 exon2                      |      |
| mtDNA  | P.nod   | gene  | 29128         | 31459  | . | -     | nad1                            |      |
| mtDNA  | P.nod   | exon  | 30824         | 31459  | . | -     | nad1 exon 1                     |      |
| mtDNA  | P.nod   | gene  | (intron)29637 | 30347- | . | .     | nad1intron protein              |      |
| mtDNA  | P.nod   | exon  | 29128         | 29607  | . | -     | nad1 exon 2                     |      |
| mtDNA  | P.nod   | gene  | 32019         | 35347  | . | -     | nad5                            |      |
| mtDNA  | P.nod   | exon  | 35024         | 35347  | . | -     | nad5 exon1                      |      |
| mtDNA  | P.nod   | gene  | (intron)33737 | 35023- | . | .     | nad5 intron protein             |      |
| mtDNA  | P.nod   | exon  | 32019         | 33671  | . | -     | nad5 exon2                      |      |
| mtDNA  | P.nod   | orf   | 35753         | 36646  | . | -     | orf3                            |      |
| mtDNA  | P.nod   | gene  | 36821         | 37105  | . | -     | nad4L                           |      |
| mtDNA  | P.nod   | gene  | 37612         | 38058  | . | -     | nad3                            |      |
| mtDNA  | P.nod   | gene  | 38059         | 39777  | . | -     | nad2                            |      |
| mtDNA  | P.nod   | gene  | 39879         | 41991  | . | -     | cox3                            |      |
| mtDNA  | P.nod   | exon  | 41773         | 41991  | . | -     | cox3 exon1                      |      |
| mtDNA  | P.nod   | exon  | 39879         | 40469  | . | -     | cox3 exon2                      |      |
| mtDNA  | P.nod   | tRNA  | 42992         | 43062  | . | +     | tRNA-Arg1                       | R1   |
| mtDNA  | P.nod   | tRNA  | 43099         | 43169  | . | +     | tRNA-Arg2                       | R2   |
| mtDNA  | P.nod   | rRNA  | 43274         | 44814  | . | +     | rns                             |      |
| mtDNA  | P.nod   | tRNA  | 45115         | 45197  | . | +     | tRNA-Leu2                       | L2   |
| mtDNA  | P.nod   | tRNA  | 45513         | 45596  | . | +     | tRNA-Tyr                        | Y    |
| mtDNA  | P.nod   | tRNA  | 45703         | 45773  | . | +     | tRNA-Asn                        | N    |
| mtDNA  | P.nod   | gene  | 46079         | 46675  | . | +     | nad6                            |      |
| mtDNA  | P.nod   | tRNA  | 46732         | 46804  | . | +     | tRNA-Val2                       | V    |
| mtDNA  | P.nod   | tRNA  | 46837         | 46908  | . | +     | tRNA-Lys                        | K    |
| mtDNA  | P.nod   | tRNA  | 47217         | 47289  | . | +     | tRNA-Gly                        | G    |
| mtDNA  | P.nod   | tRNA  | 47292         | 47363  | . | +     | tRNA-Asp                        | D    |
| mtDNA  | P.nod   | tRNA  | 47638         | 47717  | . | +     | tRNA-Ser1                       | S    |
| mtDNA  | P.nod   | tRNA  | 48148         | 48219  | . | +     | tRNA-SeC                        | SC   |
| mtDNA  | P.nod   | tRNA  | 48333         | 48407  | . | +     | tRNA-Ser2                       | S2   |
| mtDNA  | P.nod   | tRNA  | 48412         | 48485  | . | +     | tRNA-Arg3                       | R3   |
| mtDNA  | P.nod   | tRNA  | 48999         | 49083  | . | +     | tRNA-Ser3                       | S3   |
| mtDNA  | P.nod   | tRNA  | 49193         | 49265  | . | +     | tRNA-Pro                        | P    |
| mtDNA  | P.nod   | rRNA  | 49304         | 2813   | . | +     | rnl                             |      |

**Supplemental Table 2. Summary of PFAM domains used for identification.**

| <b>Gene family</b>          | <b>PFAM models</b>                                                                                                                                                 |
|-----------------------------|--------------------------------------------------------------------------------------------------------------------------------------------------------------------|
| <b>G-alpha</b>              | <b>PF00503.9</b>                                                                                                                                                   |
| <b>Cfem</b>                 | <b>PF05730.1</b>                                                                                                                                                   |
| <b>Rhodopsin</b>            | <b>PF00001.11, PF01036.8</b>                                                                                                                                       |
| <b>Hydrophobins</b>         | <b>PF01185.9, PF06766.1</b>                                                                                                                                        |
| <b>Feruloyl esterase</b>    | <b>PF07519.1</b>                                                                                                                                                   |
| <b>Cutinase</b>             | <b>PF01083.12</b>                                                                                                                                                  |
| <b>Subtilisin</b>           | <b>PF05922.7, PF00082.11</b>                                                                                                                                       |
| <b>Transcription factor</b> | <b>PF07716.5, PF00170.11, PF02045.6, PF00808.13, PF06881.1, PF04082.7, PF02200.6, PF00352.12, PF03849.4, PF03850.4, PF00382.9, PF08271.2, PF01096.9, PF07500.3</b> |
| <b>Cytochrome p450</b>      | <b>PF00067.11</b>                                                                                                                                                  |
| <b>PKS and NRPS</b>         | <b>PF08415.1, PF00668.9, PF00975.10, PF00550.14, PF08659.1, PF08392.2, PF08545.1, PF00378.9, PF00698.11, PF02801.12</b>                                            |

**Notes:**

all PFAM models derived from the Pfam\_Is dataset  
domains and families identified via hmmpfam (of HMMER, <http://hmmer.janelia.org>) using PFAM  
gathering threshold score cutoffs

**Supplemental Table 3.** List of species used in this study.

| AFTOL no. | Species                                 | Strain/voucher* | nuc-SSU   | nuc-LSU   | EF-1 $\alpha$ | RPB1      | RPB2      |
|-----------|-----------------------------------------|-----------------|-----------|-----------|---------------|-----------|-----------|
| 54        | <i>Cochliobolus heterostrophus</i>      | CBS 134.39      | AY544727  | AY544645  | DQ247790      | --        | DQ497603  |
| 59        | <i>Botrytis cinerea</i>                 | OSC 100012      | AY544695  | AY544651  | DQ471045      | DQ471116  | DQ247786  |
| 60        | <i>Morchella esculenta</i> cf.          | MV3             | AY544708  | AY544664  | DQ471046      | DQ471117  | DQ470880  |
| 87        | <i>Teloschistes exilis</i>              | --              | AY584671  | AY584647  | DQ883764      | DQ883779  | DQ883759  |
| 134       | <i>Peltigera degenii</i>                | DUKE 0047504    | AY584681  | AY584657  | DQ782897      | DQ782826  | AY584688  |
| 149       | <i>Neofabreae malicorticis</i>          | OSC 100036      | AY544706  | AY544662  | DQ847414      | DQ471124  | DQ470885  |
| 161       | <i>Fusarium</i> aff. <i>solani</i>      | GJS 89-70       | AY489697  | AY489729  | AU489624      | AY489660  | DQ518180  |
| 173       | <i>Pyrenophora tritici-repentis</i>     | OSC 100066      | AY544716  | AY544672  | --            | --        | DQ677882  |
| 274       | <i>Dothidea sambuci</i>                 | DAOM 231303     | AY544722  | AY544681  | DQ522854      | --        | DQ497606  |
| 277       | <i>Leptosphaeria maculans</i>           | DAOM 229267     | DQ470993  | DQ470946  | DQ471062      | DQ471136  | DQ470894  |
| 280       | <i>Phaeosphaeria avenaria</i>           | DAOM 226215     | AY544725  | AY544684  | DQ677941      | --        | DQ677885  |
| 505       | <i>Ustilago maydis</i>                  | PBM 2469        | AY854090  | AF453938  | AY885160      | XM_401478 | AY487636  |
| 507       | <i>Peziza vesiculosa</i>                | TL-6398         | DQ470995  | DQ470948  | DQ471066      | DQ471140  | DQ470898  |
| 639       | <i>Lecanora hybocarpa</i>               | DUKE 0047510    | DQ782883  | DQ782910  | DQ782901      | DQ782829  | DQ782871  |
| 657       | <i>Capronia pilosella</i>               | DAOM 216837     | DQ823106  | DQ823099  | DQ840565      | DQ840554  | DQ840561  |
| 776       | <i>Phanerochaete chrysosporium</i>      | FPL5175         | Genome    | Genome    | Genome        | Genome    | Genome    |
| 912       | <i>Aureobasidium pullulans</i>          | CBS 584.75      | DQ471004  | DQ470956  | DQ471075      | DQ471148  | DQ470906  |
| 928       | <i>Sclerotinia sclerotiorum</i>         | CBS 499.50      | DQ471013  | DQ470965  | DQ471086      | --        | DQ470916  |
| 940       | <i>Pleospora herbarum</i>               | CBS 191.86      | DQ247812  | DQ247804  | DQ471090      | DQ471163  | DQ247794  |
| 946       | <i>Botryosphaeria dothidea</i>          | CBS 115476      | DQ677998  | DQ678051  | DQ677944      | EU186063  | DQ767637  |
| 949       | <i>Pyronema domesticum</i>              | CBS 666.88      | DQ247813  | DQ247805  | DQ471093      | DQ471166  | DQ247795  |
| 1069      | <i>Saccharomyces cerevisiae</i>         | SGD             | SCYLR154C | SCYLR154C | Genome        | X96876    | SCYOR151C |
| 1072      | <i>Eremothecium gossypii</i>            | Basel           | AE016820  | AE016820  | Genome        | NM_209535 | AE016819  |
| 1075      | <i>Kluyveromyces lactis</i>             | Génolevures     | Genome    | Genome    | Genome        | XM_455310 | XM_451784 |
| 1078      | <i>Neurospora crassa</i>                | Broad           | X04971    | AF286411  | Genome        | XM_959004 | XM_324476 |
| 1079      | <i>Aspergillus fumigatus</i>            | TIGR            | AB008401  | AY660917  | Genome        | XM_747744 | XM_741647 |
| 1081      | <i>Magnaporthe grisea</i>               | Broad           | AB026819  | AB026819  | Genome        | XM_362207 | XM_362269 |
| 1083      | <i>Histoplasma capsulatum</i>           | WUSTL           | Genome    | Genome    | Genome        | Genome    | Genome    |
| 1192      | <i>Pneumocystis carinii</i>             | PGP             | S83267.1  | AF047831  | --            | Genome    | AY485631  |
| 1199      | <i>Schizosaccharomyces pombe</i>        | Sanger          | X54866    | Z19136    | Genome        | X56564    | D13337    |
| 1234      | <i>Taphrina deformans</i>               | CBS 356.35      | DQ471024  | DQ470973  | DQ471097      | DQ471170  | DQ470927  |
| 1289      | <i>Cladosporium cladosporioides</i>     | CBS 170.54      | DQ678004  | DQ678057  | DQ677952      | EU186064  | DQ677898  |
| 1304      | <i>Myriangium duriaei</i>               | CBS 260.36      | AY016347  | DQ678059  | DQ677954      | --        | DQ677900  |
| 1575      | <i>Phoma herbarum</i>                   | CBS 276.37      | DQ678014  | DQ678066  | DQ677962      | --        | DQ677909  |
| 1583      | <i>Ascochyta pisi</i> var. <i>pisii</i> | CBS 126.54      | DQ678018  | DQ678070  | DQ677967      | --        | DQ677913  |
| 1599      | <i>Delitschia winteri</i>               | CBS 225.62      | DQ678026  | DQ678077  | DQ677975      | --        | DQ677922  |
| 1610      | <i>Alternaria alternata</i>             | CBS 916.96      | DQ678031  | DQ678082  | DQ677980      | --        | DQ677927  |
| 1615      | <i>Mycosphaerella graminicola</i>       | CBS 292.38      | DQ678033  | DQ678084  | DQ677982      | --        | --        |
| 1618      | <i>Guignardia bidwellii</i>             | CBS 237.48      | DQ678034  | DQ678085  | DQ677983      | --        | --        |
| 1853      | <i>Elsinoë veneta</i>                   | CBS 150.27      | DQ767651  | DQ767658  | DQ767641      | --        | --        |
|           | <i>Stagonospora nodorum</i>             | Broad           | Genome    | Genome    | Genome        | Genome    | Genome    |

\*Source abbreviations:

--Gene absent in alignment

Culture collections and herbaria

ATCC - American Type Culture Collection, Manassas, VA, USA

CBS - Centraalbureau voor Schimmelcultures, Utrecht, The Netherlands

DAOM - National Mycological Herbarium, Department of Agriculture, Ottawa, Ontario, Canada

DUKE - Duke University Herbarium, Durham, NC, USA

FPL - Forest Products Laboratory, Madison, WI, USA

GJS - Collection of Gary Samuels, USDA, Beltsville, MD, USA

MV3 - Collection of Kerry O' Donnell, ARS, Peoria, IL, USA

OSC - Oregon State University Herbarium, Corvallis, OR, USA

TBM - Clark University Herbarium, Worcester, MI, USA

TL - Collection of T. Læssøe, Department of Mycology, University of Copenhagen, Denmark

Genome resources

Basel - University of Basel, Switzerland

Broad - Broad Institute, Cambridge, MA, USA

Génolevures - Collection de Levures d'Intérêt Biotechnologique, Institut National Agronomique,  
Thiverval-Grignon, France  
PGP - Pneumocystis Genome Project, University of Cincinnati, Cincinnati, OH, USA  
SGD - Saccharomyces genome database  
Sanger – Wellcome Trust Sanger Institute, Cambridge UK  
TIGR - The Institute for Genomic Research Rockville, MD, USA  
WUSTL - St. Louis Genome Sequencing Center, Washington University, Seattle, WA, USA

**Supplemental Table 4. Quantitative PCR Primers.**

| Quantitative PCR |                         |
|------------------|-------------------------|
| primers          | Sequence 5' to 3'       |
| SNOG_00557-Fwd   | CAACTGTCCGGAGCATCCCA    |
| SNOG_00557-Rev   | AGTTTGCGTTGGAGGGGTCG    |
| SNOG_03877-Fwd   | ATGCCGTCCACCAGAAGCAAGAA |
| SNOG_03877-Rev   | CGCGGAGCGTATGTGGCAAGA   |
| SNOG_08496-Fwd   | ATCAAGGAGGGTGCCACGTTC   |
| SNOG_08496-Rev   | AGGGAGCAGTTTCGGGTTCG    |
| SNOG_11873-Fwd   | CGACATCCTCGGCCTCGAAT    |
| SNOG_11873-Rev   | ACAATGCCATGCATCCACGTC   |
| SNOG_12085-Fwd   | GGTTGGGGAAAGCGGGAGTT    |
| SNOG_12085-Rev   | CGTGCTGAGCACCATCAACGT   |
| SNOG_12441-Fwd   | ACAAGTCGGACGTCATTGCGA   |
| SNOG_12441-Rev   | TGTTCTCGAAGCTGGCTGGG    |
| SNOG_14274-Fwd   | CACGAATCCGCTGGCACAGT    |
| SNOG_14274-Rev   | TGACGGGTGGTGTGAGAGGA    |
| SNOG_16499-Fwd   | GCGCATGGCTGCCAACTATG    |
| SNOG_16499-Rev   | TGGCGTTCAAGCTCTGCATCA   |
| Actin-Fwd        | AGTCGAAGCGTGGTATCCT     |
| Actin-Rev        | ACTTGGGGTTGATGGGAG      |

**Supplemental Table 5. EST data for abundant *in planta* associated genes.**

| Gene              | BlastX annotation                                | GO classifier                                       | BlastX<br>expect<br>value | EST totals           |                     | <i>P Value</i> |
|-------------------|--------------------------------------------------|-----------------------------------------------------|---------------------------|----------------------|---------------------|----------------|
|                   |                                                  |                                                     |                           | <i>in<br/>planta</i> | <i>in<br/>vitro</i> |                |
| <b>SNOG_16499</b> | Norsolorinic acid reductase, aldo/keto reductase | GO:0016491; oxidoreductase activity                 | 4.0E-117                  | 26                   | 0                   | 4.60E-10       |
| <b>SNOG_03877</b> | Oxidoreductase                                   | no match                                            | 8.0E-27                   | 24                   | 0                   | 2.26E-09       |
| <b>SNOG_00557</b> | Arabinofuranosidase                              | GO:0046556; alpha-N-arabinofuranosidase activity    | 2.0E-132                  | 21                   | 0                   | 2.47E-08       |
| <b>SNOG_12085</b> | Aldose epimerase                                 | GO:0004034; aldose 1-epimerase activity             | 9.0E-108                  | 11                   | 0                   | 7.08E-05       |
| <b>SNOG_08496</b> | rho-gdp dissociation inhibitor                   | GO:0005094; Rho GDP-dissociation inhibitor activity | 7.0E-74                   | 10                   | 0                   | 1.57E-04       |
| <b>SNOG_12441</b> | Alanine transaminase                             | GO:0008483; transaminase activity                   | 0.0E+00                   | 10                   | 0                   | 1.57E-04       |
| <b>SNOG_14274</b> | Arabitol 4-dehydrogenase                         | GO:0050019 ;L-arabinitol 4-dehydrogenase activity   | 5.0E-147                  | 9                    | 0                   | 3.48E-04       |
| <b>SNOG_11873</b> | Dioxygenase, catechol/protocatechuate            | GO:0018576, catechol 1,2-dioxygenase activity       | 4.0E-105                  | 7                    | 0                   | 1.71E-03       |
